# THE AMERICAN JOURNAL OF PSYCHIATRY

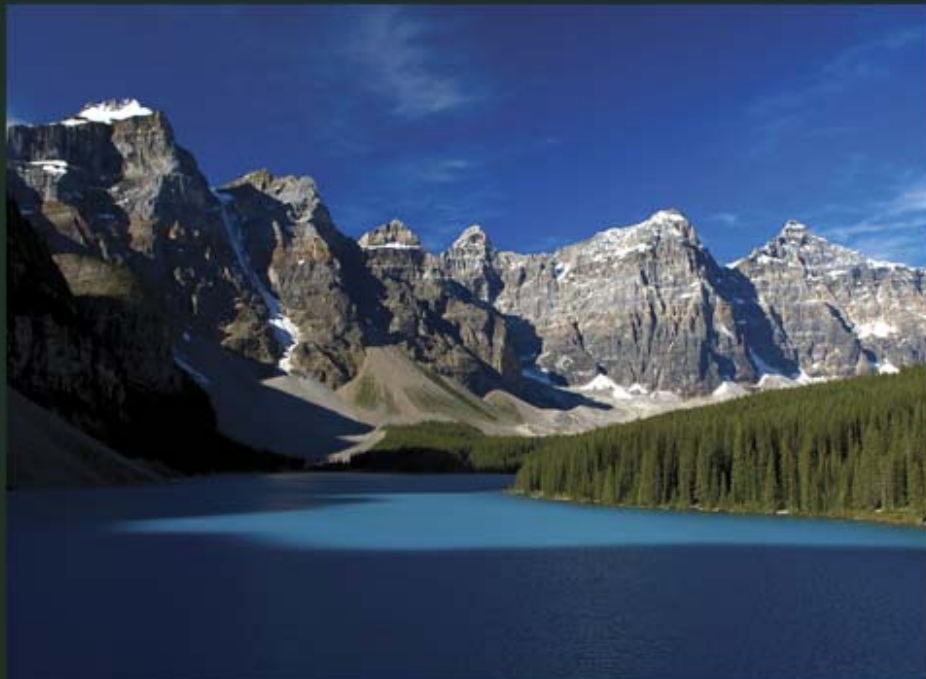

*Shades of Blue: Light and Dark in the Canadian Rockies*

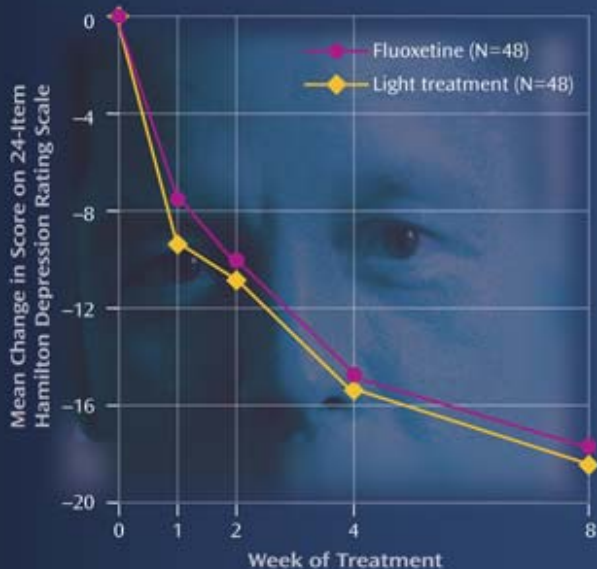

## New Features:

CME, Audio, DSM-V 770

Randomized, Double-Blind Trial of Olanzapine Versus Placebo in Patients Prodromally Symptomatic for Psychosis

Thomas H. McGlashan et al. 790

Early Detection of the First Episode of Schizophrenia and Suicidal Behavior

Ingrid Melle et al. 800

The CAN-SAD Study: A Randomized Controlled Trial of the Effectiveness of Light Therapy and Fluoxetine in Patients With Winter Seasonal Affective Disorder

Raymond W. Lam et al. 805

Predictors of 2-Year Outcome for Patients with Borderline Personality Disorder

John G. Gunderson et al. 822

May 2006

Volume 163 • Number 5

Official Journal of the  
AMERICAN PSYCHIATRIC ASSOCIATION

[ajp.psychiatryonline.org](http://ajp.psychiatryonline.org)
