# THE AMERICAN JOURNAL OF PSYCHIATRY

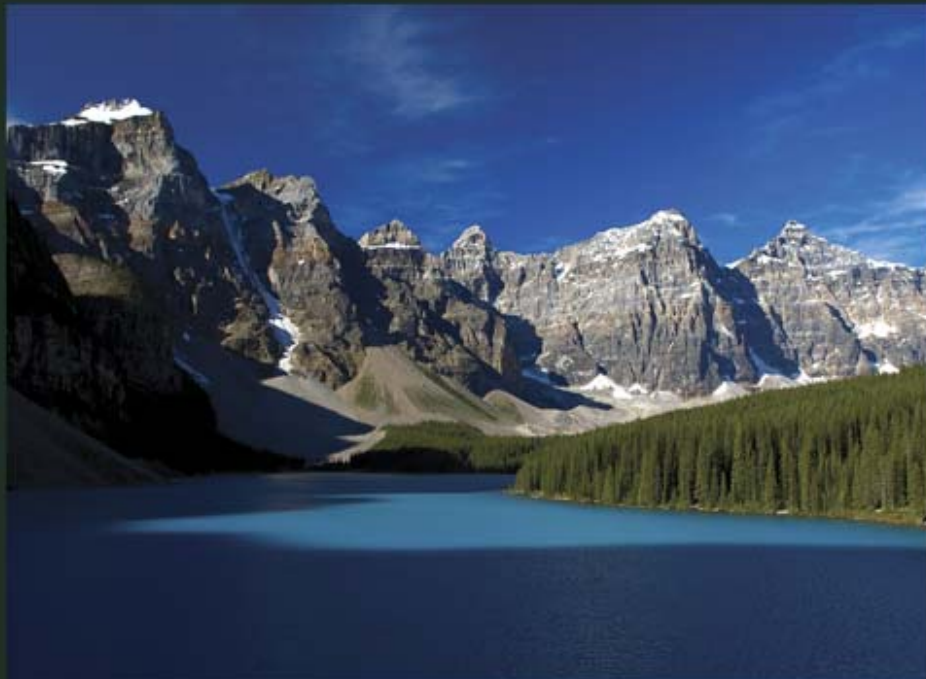

*Shades of Blue: Light and Dark in the Canadian Rockies*

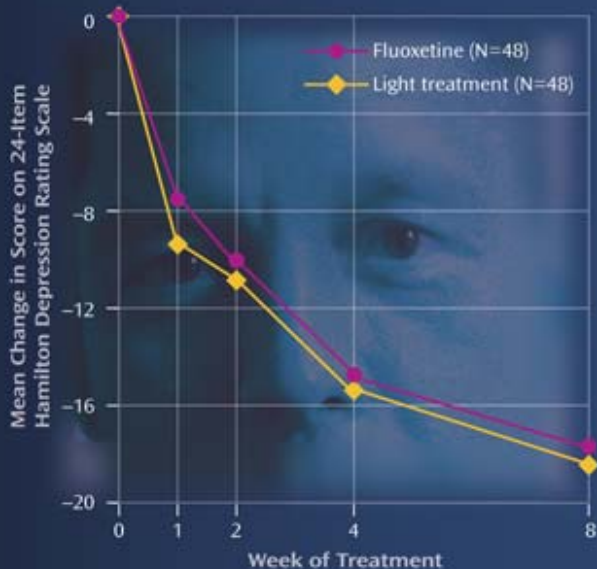

## New Features:

CME, Audio, DSM-V 770

Randomized, Double-Blind Trial of Olanzapine Versus Placebo in Patients Prodromally Symptomatic for Psychosis

Thomas H. McGlashan et al. 790

Early Detection of the First Episode of Schizophrenia and Suicidal Behavior

Ingrid Melle et al. 800

The CAN-SAD Study: A Randomized Controlled Trial of the Effectiveness of Light Therapy and Fluoxetine in Patients With Winter Seasonal Affective Disorder

Raymond W. Lam et al. 805

Predictors of 2-Year Outcome for Patients with Borderline Personality Disorder

John G. Gunderson et al. 822

May 2006

Volume 163 • Number 5

Official Journal of the  
AMERICAN PSYCHIATRIC ASSOCIATION

[ajp.psychiatryonline.org](http://ajp.psychiatryonline.org)

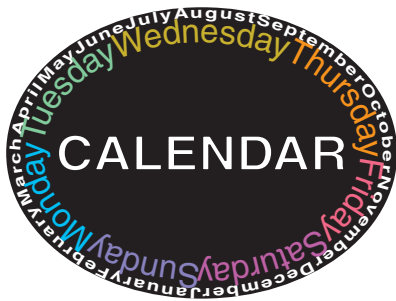

For free listing of your organization's official annual or regional meeting, please send us the following information: sponsor, location, inclusive dates, type and number of continuing education credits (if available), and the name, address, and telephone number of the person or group to contact for more information. In order for an event to appear in our listing, all notices and changes must be received at least 6 months in advance of the meeting and should be addressed to:

Calendar, American Journal of Psychiatry, 1000 Wilson Boulevard, Suite 1825, Arlington, VA 22209-3901, (703) 907-8572 (tel), [jblair@psych.org](mailto:jblair@psych.org) (e-mail).

Because of space limitations, only listings of meetings of the greatest interest to Journal readers will be included.

## JUNE

**June 7–10**, Academy for Eating Disorders International Conference on Eating Disorders, Barcelona, Spain. Contact: AED, 60 Revere Dr, Ste. 500, Northbrook, IL 60062-1577; (847) 498-4274 (tel), (847) 480-9282 (fax), [info@aedweb.org](mailto:info@aedweb.org) (e-mail), [www.aedweb.org](http://www.aedweb.org) (web site).

## SEPTEMBER

**September 9–10**, Stanford Department of Psychiatry and the Association for Research in Personality Disorders (ARPD) will be presenting an educational program entitled "Personality Disorders, Research and Treatment," Stanford, CA. Contact: Pascale Goupillaud Stemmler, Department of Psychiatry and Behavioral Sciences, Stanford University School of Medicine, 401 Quarry Road, Room 3365, Stanford, California 94305; (650) 725-3193 (tel), (650) 725-3194 (fax), [pascale@stanford.edu](mailto:pascale@stanford.edu) (e-mail).

## OCTOBER

**October 3–6**, International Early Psychosis Association conference: "Beyond the Crossroads," Birmingham, United Kingdom. Contact: Happenings Australia, (+61 3) 9866 6288 (tel), (+61 3) 9866 6313 (fax), [event@happenings.com.au](mailto:event@happenings.com.au) (e-mail), [www.happenings.com.au](http://www.happenings.com.au) (web site).

**October 5–8**, 58th Institute on Psychiatric Services, American Psychiatric Association, New York. Contact: Jill Gruber, APA Annual Meetings Dept., 1000 Wilson Blvd., Ste. 1825, Arlington, VA 22209; (703) 907-7815.

**October 13–15**, International Conference on Schizophrenia (ICONS II), Chennai, India. Contact: Dr. R. Thara, Schizophrenia Research Foundation (SCARF), R/7A, North Main Road, West Anna Nagar Extension, Chennai, India 600101; (044) 2615 3971 (tel), (044) 2615 1073 (fax),

[scarf@vsnl.com](mailto:scarf@vsnl.com) (e-mail), [www.icons-scarf.org](http://www.icons-scarf.org) (web site)

**October 24–29**, 53rd Annual Meeting, American Academy of Child and Adolescent Psychiatry, San Diego. Contact: Anita Wiler, Assistant Director of Meetings, AACAP, 3615 Wisconsin Ave., N.W., Washington, DC 20016-3007; (202) 966-7300 Ext. 101 (tel), (202) 966-5894 (fax), [meetings@aacap.org](mailto:meetings@aacap.org) (e-mail), [www.aacap.org](http://www.aacap.org) (web site).

## FEBRUARY 2007

**February 21–25**, annual meeting of the American College of Psychiatrists, Palm Springs, California. Contact: American College of Psychiatrists, 732 Addison St., Ste. B, Berkeley, CA 94710; (510) 704-8020 (tel), (510) 704-0113 (fax), [Barbara@acpsych.org](mailto:Barbara@acpsych.org) (e-mail).

## MARCH

**March 1–4**, 20th Annual Meeting of the American Association for Geriatric Psychiatry, New Orleans. Contact: AAGP, 7910 Woodmont Ave., Ste. 1050, Bethesda, MD 20814-3004; (301) 654-7850 (tel), (301) 654-4137 (fax), [www.aagpmeeting.org](http://www.aagpmeeting.org) (web site).

## APRIL

**April 18–21**, 28th Annual Meeting and Scientific Sessions of the Society of Behavioral Medicine, Miami Beach. Contact: Society of Behavioral Medicine, 17000 Commerce Parkway, Ste. C, Mount Laurel, NJ 08054; (856) 439-1297 (tel), (856) 439-0525 (fax), [info@sbm.org](mailto:info@sbm.org) (e-mail).

## MAY

**May 19–24**, 160th Annual Meeting of the American Psychiatric Association, San Diego. Contact: Cathy Nash, APA Annual

Meetings Dept., 1000 Wilson Blvd., Ste. 1825, Arlington, VA 22209; (703) 907-7822.

## OCTOBER

**October 7–11**, 15th World Congress on Psychiatric Genetics, New York. Contact: Lynn E DeLisi, International Society of Psychiatric Genetics, NYU School of Medicine, 650 First Avenue, 5th Floor Room 543, New York, NY 10016; (212) 263-3420 (tel), (212) 263-3407 (fax).

**October 11–14**, 59th Institute on Psychiatric Services, American Psychiatric Association, New Orleans, LA. Contact: Jill Gruber, APA Annual Meetings Dept., 1000 Wilson Blvd., Ste. 1825, Arlington, VA 22209; (703) 907-7815.

**October 12–15**, Annual Meeting of the Society for the Study of Psychiatry and Culture (SSPC), Hyatt Regency Capitol Hill, Washington, DC. Contact: Jim Boehnlein or Shannon Squire, (503) 220-4481, [shannon.squire@med.va.gov](mailto:shannon.squire@med.va.gov) (e-mail).

**October 23–28**, 54th Annual Meeting of the American Academy of Child and Adolescent Psychiatry, Boston. Contact: AACAP, 3615 Wisconsin Avenue, N.W., Washington, DC 20016-3007; (202) 966-7300 (tel), (202) 966-2891 (fax), [meetings@aacap.org](mailto:meetings@aacap.org) (e-mail), [www.aacap.org](http://www.aacap.org) (web site).

## FEBRUARY 2008

**February 15–18**, 21st Annual Meeting of the American Association for Geriatric Psychiatry, Washington, DC. Contact: AAGP, 7910 Woodmont Ave., Ste. 1050, Bethesda, MD 20814-3004; (301) 654-7850 (tel), (301) 654-4137 (fax), [www.aagpmeeting.org](http://www.aagpmeeting.org) (web site).

*Continued on page A44*

# Psychological Medicine

Volume 36 Number 4 April 2006

## CONTENTS

---

|                                                                                                                                                                                                          |     |                                                                                                                                                                                                                                                     |     |
|----------------------------------------------------------------------------------------------------------------------------------------------------------------------------------------------------------|-----|-----------------------------------------------------------------------------------------------------------------------------------------------------------------------------------------------------------------------------------------------------|-----|
| In this Issue                                                                                                                                                                                            | 429 | <b>Profile of neurocognitive impairments associated with female in-patients with anorexia nervosa</b> FOWLER, L., BLACKWELL, A., JAFFA, A., PALMER, R., ROBBINS, T. W., SAHAKIAN, B. J., AND DOWSON, J. H.                                          | 517 |
| <b>REVIEW ARTICLES</b>                                                                                                                                                                                   |     |                                                                                                                                                                                                                                                     |     |
| <b>A meta-analysis of negative symptoms in dual diagnosis schizophrenia</b> POTVIN, S., SEPEHRY, A. A., AND STIP, E.                                                                                     | 431 | <b>Do illness characteristics and familial risk differ between women with anorexia nervosa grouped on the basis of personality pathology?</b> HOLLIDAY, J., LANDAU, S., COLLIER, D., AND TREASURE, J.                                               | 529 |
| <b>Brain reserve and dementia: a systematic review</b> VALENZUELA, M. J., AND SACHDEV, P.                                                                                                                | 441 | <b>Preliminary evidence that gonadal hormones organize and activate disordered eating</b> KLUMP, K. L., GOBROGGE, K. L., PERKINS, P. S., THORNE, D., SISK, C. L., AND BREEDLOVE, S. M.                                                              | 539 |
| <b>ORIGINAL ARTICLES</b>                                                                                                                                                                                 |     |                                                                                                                                                                                                                                                     |     |
| <b>Selective attention for negative information and depression in schizophrenia</b> WATERS, F. A. V., BADCOCK, J. C., AND MAYBERY, M. T.                                                                 | 455 | <b>The correlation between striatal dopamine D<sub>2</sub>/D<sub>3</sub> receptor availability and verbal intelligence quotient in healthy volunteers</b> GUO, J. E., YANG, Y. K., CHIU, N. T., YEH, T. L., CHEN, P. S., LEE, I. H., AND CHU, C. L. | 547 |
| <b>Impaired verbal self-monitoring in psychosis: effects of state, trait and diagnosis</b> JOHNS, L. C., GREGG, L., ALLEN, P., AND MCGUIRE, P. K.                                                        | 465 | <b>Effectiveness of cognitive-behavioural, person-centred, and psychodynamic therapies as practised in United Kingdom national health service settings</b> STILES, W. B., BARKHAM, M., TWIGG, E., MELLOR-CLARK, J., AND COOPER, M.                  | 555 |
| <b>Thought disorder in schizophrenia is associated with both executive dysfunction and circumscribed impairments in semantic function</b> STIRLING, J., HELLEWELL, J., BLAKEY, A., AND DEAKIN, W.        | 475 |                                                                                                                                                                                                                                                     |     |
| <b>Longitudinal studies of antisaccades in antipsychotic-naive first-episode schizophrenia</b> HARRIS, M. S. H., REILLY, J. L., KESHAVAN, M. S., AND SWEENEY, J. A.                                      | 485 | <b>BOOK REVIEWS</b>                                                                                                                                                                                                                                 |     |
| <b>Lateralized deficit of response inhibition in early-onset schizophrenia</b> BELLGROVE, M. A., CHAMBERS, C. D., VANCE, A., HALL, N., KARAMITSIOS, M., AND BRADSHAW, J. L.                              | 495 | <i>Treating Bipolar Disorder: A Clinician's Guide to Interpersonal and Social Rhythm Therapy</i> GRUENBERG, A. M.                                                                                                                                   | 567 |
| <b>Mild cognitive impairment: applicability of research criteria in a memory clinic and characterization of cognitive profile</b> ALLADI, S., ARNOLD, R., MITCHELL, J., NESTOR, P. J., AND HODGES, J. R. | 507 | <i>Anxiety Disorders in Adults: A Clinical Guide</i> HODGINS, G.                                                                                                                                                                                    | 568 |
|                                                                                                                                                                                                          |     | <i>Attachment from Infancy to Adulthood: The Major Longitudinal Studies</i> STEIN, H.                                                                                                                                                               | 569 |

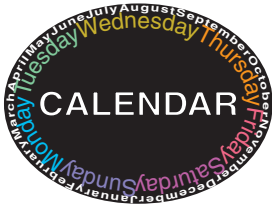

Continued from page A18

## MAY

**May 3–8**, 161st Annual Meeting of the American Psychiatric Association, Washington, DC. Contact: Cathy Nash, APA Annual Meetings Dept., 1000 Wilson Blvd., Ste. 1825, Arlington, VA 22209; (703) 907-7822.

## OCTOBER

**October 2-5**, 60th Institute on Psychiatric Services, American Psychiatric Association, Chicago, IL. Contact: Jill Gruber, APA Annual Meetings Dept., 1000 Wilson Blvd., Ste. 1825, Arlington, VA 22209; (703) 907-7815.

## CONTENTS (Continued from page A5)

### Book Forum

943

947 Books Received

### Other Items of Interest

948 Continuing Medical Education

A11 Officers of the American Psychiatric Association

A18 Calendar

A34 *Psychological Medicine* contents (April 2006)

A46 How to Activate Your Online Subscription

A48 *The British Journal of Psychiatry* contents (April 2006)

A70 Index to Advertisers

### Cover

The top picture ("Shades of Blue" © 2006, Alvin Brown, photographer) shows Moraine Lake in Banff National Park, Alberta. This issue of the Journal features a multi-center study from four Canadian cities by Lam et al. (p.805), who compared the efficacy of light therapy to antidepressants for seasonal affective disorder treatment in a double-blind, randomized controlled trial over three winter seasons. While an earlier response and a lower rate of adverse events were seen with light treatment, the study found comparable effectiveness and tolerability for both treatments, even in those with more severe illness. Cover design by Jason Glance.

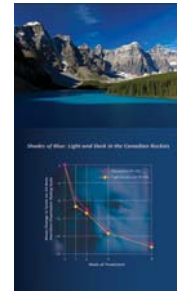

## Coming in the June 2006 issue

### THE AMERICAN JOURNAL OF

# PSYCHIATRY

*Sticks, Stones and Hurtful Words: Combined Effects of Childhood Maltreatment Matter Most*

M.H. Teicher, J.A. Samson, A. Polcari, C.E. McGreenery

*Offspring of Depressed Parents: 20 Years Later*

M.M. Weissman, P. Wickramaratne, Y. Nomura, V. Warner, D. Pilowsky, H. Verdeli

*The Caregiving Environments Provided to Children by Depressed Mothers With or Without an Antisocial History*

J. Kim-Cohen, A. Caspi, M. Rutter, M. Polo Tomas, T.E. Moffitt

*Interaction Between MAO-A Genotype and Maltreatment in the Risk for Conduct Disorder: Failure to Confirm in Adolescent Patients*

S.E. Young, A. Smolen, J.K. Hewitt, B.C. Haberstick, M.C. Stallings, R.P. Corley, T.J. Crowley

# THE AMERICAN JOURNAL OF PSYCHIATRY

*Official Journal of the American Psychiatric Association*

## Instructions for Activating Your Online Subscription

**As with most electronic periodicals, there are step-by-step instructions that must be followed to enable you to receive your online issue of *The American Journal of Psychiatry*. Please follow the procedures outlined below.**

Make sure you have your customer identification number available. This number is printed on your *Journal* mailing label, directly above your name and address. If you cannot locate this number, please contact American Psychiatric Publishing, Inc., through one of the following methods:

- e-mail: [accessnumber@psych.org](mailto:accessnumber@psych.org)
- phone: (800) 368-5777
- fax: (703) 907-1091
- mail:

American Psychiatric Publishing, Inc.  
1000 Wilson Blvd., Suite 1825  
Arlington, VA 22209-3901  
Attn: Circulation Department.

Internet: <http://www.psychiatryonline.org>. Click on the "Subscriptions" button located near the bottom of the page. Then click on the appropriate link:

- **ACTIVATE Your Member or Individual (Nonmember) Subscription**
- **ACTIVATE Your Institutional Subscription**

Please review the Terms and Conditions of the online subscription before starting the subscription process. Before entering your customer number in the box provided, follow the instructions below.

**For APA Members**, you will find your member number on the mailing label above your name. It is a 10-digit number beginning with zeros. Enter your number in the box and click the SUBMIT button.

**For Individual Nonmembers and Institutions**, your customer number is on the mailing label above your name. It is a 10-digit number beginning with 22 or 30. Enter this number in the box and click the SUBMIT button.

Fill out all the information on the next screen and press the "Send Form" button at the bottom on the right. **DO NOT CLICK** the "Clear Form" button.

### **INSTITUTIONAL SUBSCRIBERS ONLY**

You will then be brought to the screen to enter the IP addresses for your institution. These IP addresses should conform to the Terms and Conditions of your license. Read the "Help with IP Addresses" to see how to enter IP ranges.

When finished, click the "Done" button. You will receive an e-mail confirmation that your subscription has been activated.

The American Journal of Psychiatry is online at [ajp.psychiatryonline.org](http://ajp.psychiatryonline.org)

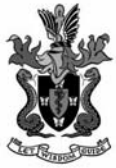

# THE BRITISH JOURNAL OF PSYCHIATRY

April 2006, VOL. 188

<http://bjp.rcpsych.org>

- A12 Editorial Board
- A13 Highlights of this issue
- A14 Psychiatry in pictures

## EDITORIALS

- 301 **Psychiatric drug promotion and the politics of neoliberalism**  
J. Moncrieff
- 303 **Patient preference randomised controlled trials in mental health research**  
L. Howard and G. Thornicroft

## REVIEW ARTICLE

- 305 **Psychotherapy plus antidepressant for panic disorder with or without agoraphobia. Systematic review**  
T.A. Furukawa, N. Watanabe, and R. Churchill

## PAPERS

- 313 **Cognitive-behavioural therapy for severe and recurrent bipolar disorders. Randomised controlled trial**  
J. Scott, E. Paykel, R. Morriss, R. Bentall, P. Kinderman, T. Johnson, R. Abbott, and H. Hayurst
- 321 **What can we conclude from studies on psychotherapy in bipolar disorder? Invited commentary**  
D. Lam
- 323 **Cost-utility of brief psychological treatment for depression and anxiety**  
L. Hakkaart-van Roijen, A. van Straten, M. Al, F. Rutten, and M. Donker
- 330 **Cost-effectiveness of preventing depression in primary care patients. Randomised trial**  
F. Smit, G. Willemse, M. Koopmanschap, S. Onrust, P. Cuijpers, and A. Beekman
- 337 **Cost-effectiveness and cost-utility of tricyclic antidepressants, selective serotonin reuptake inhibitors and lofepramine. Randomised controlled trial**  
T. Kendrick, R. Peveler, L. Longworth, D. Baldwin, M. Moore, J. Chatwin, A. Thornett, J. Goddard, M. Campbell, H. Smith, M. Buxton, and C. Thompson

- 346 **Duloxetine in the prevention of relapse of major depressive disorder. Double-blind placebo-controlled study**

D.G. Perahia, I. Gilaberte, F. Wang, C.G. Wiltse, S.A. Huckins, J.W. Clemens, S.A. Montgomery, A.L. Montejo, and M.J. Detke

- 354 **Relationship between antidepressant sales and secular trends in suicide rates in the Nordic countries**

S. Reseland, I. Bray, and D. Gunnell

- 359 **Depressive symptoms in urban population samples in Russia, Poland and the Czech Republic**

M. Bobak, H. Pikhart, A. Pajak, R. Kubinova, S. Malyutina, H. Sebakova, R. Topor-Madry, Y. Nikitin, and M. Marmot

- 366 **Neuropsychological dysfunction, soft neurological signs and social disability in euthymic patients with bipolar disorder**

U. Goswami, A. Sharma, U. Khastagir, I.N. Ferrier, A.H. Young, P. Gallagher, J.M. Thompson, and P.B. Moore

- 374 **Personality and substance use disorders in young adults**

P. Moran, C. Coffey, A. Mann, J.B. Carlin, and G.C. Patton

- 380 **Ethnic differences among patients in high-security psychiatric hospitals in England**

M. Leese, G. Thornicroft, J. Shaw, S. Thomas, R. Mohan, M.A. Harty, and M. Dolan

- 386 **Emergency psychiatry, compulsory admissions and clinical presentation among immigrants to The Netherlands**

C.L. Mulder, G.T. Koopmans, and J.-P. Selten

## COLUMNS

- 392 Correspondence
- 397 One hundred years ago
- 397 Corrigenda
- 398 Contents of the *American Journal of Psychiatry*
- 399 Contents of *Advances in Psychiatric Treatment*
- 400 From the Editor's desk
