# THE AMERICAN JOURNAL OF PSYCHIATRY

## EDITOR-IN-CHIEF

Robert Freedman, M.D.

## DEPUTY EDITORS

David A. Lewis, M.D.

Robert Michels, M.D.

Daniel S. Pine, M.D.

Susan K. Schultz, M.D.

Carol A. Tamminga, M.D.

## EDITORIAL STAFF

### Editorial Director

Sandra L. Patterson

### Editorial Manager

Michael D. Roy

### Senior Editors

Leannah M. Harding, E.L.S.

Jane Weaver, E.L.S.

### Assistant Editor

Angela Moore

### Production Editor

Julie C. Blair

### Graphic Designer

Jason Glance

### Peer Review Administrator

Molly Douglas

### Editorial Assistants

Lisa Devine

Astewaye Yigzaw

### Assistants to the Editors

Lois Campbell

Aniko Evans

Rachel Hogg

Russell A. Scholl

## ASSOCIATE EDITORS

Francine M. Benes, M.D., Ph.D.

Wade H. Berrettini, M.D., Ph.D.

Kathleen T. Brady, M.D., Ph.D.

David P. Brent, M.D.

Cameron S. Carter, M.D.

J. Raymond DePaulo, Jr., M.D.

Leon Eisenberg, M.D.

Glen O. Gabbard, M.D.

Howard H. Goldman,  
M.D., Ph.D.

Jeffrey A. Lieberman, M.D.

Robert C. Malenka, M.D., Ph.D.

Maria A. Oquendo, M.D.

Barbara L. Parry, M.D.

Larry J. Siever, M.D.

Myrna M. Weissman, Ph.D.

## EDITORS EMERITI

Nancy C. Andreasen,  
M.D., Ph.D.

John C. Nemiah, M.D.

## FORMER EDITORS

Amariah Brigham, M.D.

1844-1849

T. Romeyn Beck, M.D.

1849-1854

John P. Gray, M.D.

1854-1886

G. Alder Blumer, M.D.

1886-1894

Richard Dewey, M.D.

1894-1897

Henry M. Hurd, M.D.

1897-1904

Edward N. Brush, M.D.

1904-1931

Clarence B. Farrar, M.D.

1931-1965

Francis J. Braceland, M.D.

1965-1978

The American Journal of Psychiatry is online at [ajp.psychiatryonline.org](http://ajp.psychiatryonline.org)

# THE AMERICAN PSYCHIATRIC ASSOCIATION

1000 Wilson Blvd., Suite 1825, Arlington, VA 22209-3901  
(888) 357-7924 (toll-free inside the U.S. and Canada) / (703) 907-7300  
web site: [www.psych.org](http://www.psych.org) / e-mail: [apa@psych.org](mailto:apa@psych.org)

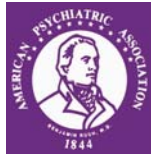

## OFFICERS 2005–2006

|                            |                                   |
|----------------------------|-----------------------------------|
| <b>President</b>           | Steven S. Sharfstein, M.D.        |
| <b>President-Elect</b>     | Pedro Ruiz, M.D.                  |
| <b>Vice-President</b>      | Nada L. Stotland, M.D.,<br>M.P.H. |
| <b>Secretary-Treasurer</b> | Carolyn B. Robinowitz,<br>M.D.    |

## ASSEMBLY

|                      |                            |
|----------------------|----------------------------|
| <b>Speaker</b>       | Joseph Ezra V. Rubin, M.D. |
| <b>Speaker-Elect</b> | Michael Blumenfield, M.D.  |
| <b>Recorder</b>      | Jeffrey Akaka, M.D.        |

## MEDICAL DIRECTOR'S OFFICE

|                                                                               |                                   |
|-------------------------------------------------------------------------------|-----------------------------------|
| <b>Medical Director</b>                                                       | James Scully, M.D.                |
| <b>Chief Executive Officer,<br/>American Psychiatric<br/>Publishing, Inc.</b> | Ronald E. McMillen                |
| <b>Executive Director,<br/>APIRE<br/>Division of Research</b>                 | Darrel A. Regier, M.D.,<br>M.P.H. |

## BOARD OF TRUSTEES

|                                |                                 |
|--------------------------------|---------------------------------|
| Paul S. Appelbaum, M.D.        | James E. Ninninger, M.D.        |
| Tanya R. Anderson, M.D.        | Donna M. Norris, M.D.           |
| Renee L. Binder, M.D.          | Roger Peele, M.D.               |
| Thomas K. Ciesla, M.D.         | Michelle B. Riba, M.D., M.S.    |
| Mary Helen Davis, M.D.         | Anne Marie T. Sullivan,<br>M.D. |
| David Fassler, M.D.            | Albert V. Vogel, M.D.           |
| Marcia K. Goin, M.D.,<br>Ph.D. | Sidney H. Weissman, M.D.        |
| Daniel T. Mamah, M.D.          |                                 |

## AMERICAN PSYCHIATRIC PUBLISHING, INC.

### BOARD OF DIRECTORS 2005-2006

|                            |                                         |
|----------------------------|-----------------------------------------|
| <b>President and Chair</b> | Thomas N. Wise, M.D.                    |
| <b>Secretary</b>           | Glen O. Gabbard, M.D.                   |
| <b>Treasurer</b>           | Nada L. Stotland, M.D.,<br>M.P.H.       |
| Francine Cournos, M.D.     | Alan F. Schatzberg, M.D.                |
| John M. Oldham, M.D.       | Donna E. Stewart, M.D.,<br>F.R.C.P.(C.) |
| Laura W. Roberts, M.D.     |                                         |

### EX-OFFICIO MEMBERS

|                                                  |                               |
|--------------------------------------------------|-------------------------------|
| <b>APA President</b>                             | Steven S. Sharfstein, M.D.    |
| <b>APA President Elect</b>                       | Pedro Ruiz, M.D.              |
| <b>APA Secretary-Treasurer</b>                   | Carolyn B. Robinowitz, M.D.   |
| <b>APA Medical Director</b>                      | James Scully, M.D.            |
| <b>Editor-in-Chief,<br/>Psychiatric Services</b> | Howard Goldman, M.D.          |
| <b>Editor-in-Chief, Books</b>                    | Robert E. Hales, M.D., M.B.A. |

The American Journal of Psychiatry is online at [ajp.psychiatryonline.org](http://ajp.psychiatryonline.org)
